# Supplementary material for: Runx Family Genes in a Cartilaginous Fish, the Elephant Shark (Callorhinchus milii)
Source: PubMed Central journal article supplement (PMC3974841; doi:10.1371/journal.pone.0093816), 2014-04-03
Supplement: pone.0093816.s001.pdf [file pone.0093816.s001.pdf]

**Figure S1**

**A**

|      |                                                                                 |                |
|------|---------------------------------------------------------------------------------|----------------|
|      | GTCACATGATTGGCA - AGAACCAATT - - - - GAGATGGGCTGT - - - - - GGAAAGGGGAAC        | Human          |
|      | GTCACGTGATTGGCA - AGAGCCAATG - - - - GCGGTGGGCTGT - - - - - GGAAAGGGGAAC        | Mouse          |
|      | GTCACATGGTTGGCA - AGAACCAATT - - - - AAGA TGGGCTGT - - - - - GGAAAGGGGAAC       | Dog            |
|      | GTCACATGATTGGCA - AGCACCAATT - - - - AAGATGGGCTGT - - - - - GGAAAGAGGAAC        | Opossum        |
|      | GTCACATGATGGGTC - GGGGCCAATG - - - - GAGTTGGGCTGT - - - - - GGAAAGGGGAAC        | Platypus       |
|      | GTCACGTGACTCAAA - GGGACCAATG - - - - GAGGCAGGTTAT - - - - - GGAAAGGGGAAC        | Chicken        |
|      | GTCACGTGATGCAAA - CCAGCCAATA - - - - AAGGGAGACTGCCAAAAAAAAAGGGGAAC              | Frog           |
| +1   | GCCACGTGATTACTGGAGCCCAATT - - - - GGATCGAGCTGC - - - - - CAAAGGGGAAC            | <i>C.milli</i> |
|      | GACACACACACACAAAACACACACTTTTAAAGCCATGCGAGAA TTCAAAGAAAGCAAAC T                  | Fugu           |
|      |                                                                                 |                |
|      | AGTTA - AATTTGT - - - - - AATTTGGGTTGTGTGAAA - ACTTCTTTGGG - CCTCATA            | Human          |
|      | AGTTA - AATTTGT - - - - - AATTTGGGTTGTGTGAAA - ACTTCTTTGGA - CCTCATA            | Mouse          |
|      | AGTTA - AATTTGT - - - - - AATTTGGGTTGTGTGAAA - ACTTCTTTGGG - CCTCATA            | Dog            |
|      | AGTTA - AATTTGT - - - - - AATTTGGTGTGTGAAACACTTCTTTGGGGCCTCATA                  | Opossum        |
|      | AGTTA - AATTTGT - - - - - AATTTGGGTTGTGTGAAACACTTCTTTGGGGCCTCATA                | Platypus       |
|      | AGTTA - AATTTGT - - - - - AATTTGGGTTGTGTGAAACACTTCTTTGGG - CCTCATA              | Chicken        |
|      | AGTCAAAATTTTCTCAT - TATTTGGTGTGTGCAAGACTTGTTTGGG - CCTCAGA                      | Frog           |
| +50  | AGTTA - AATTTGT - - - - - AATTTGGGTTGTGTGAAA - - - CTCTTTGGGCCCTCATA            | <i>C.milli</i> |
|      | TGCAAGATCGGGCAGACGACCTCTCTTTGGTGTGCTGAACACTGAGATTCA TCCTGCA                     | Fugu           |
|      |                                                                                 |                |
|      | <u>          </u> <u>          </u>                                             |                |
|      | AACAACCA - - - - CAGAACC - - - - - ACAAGTTGGGTAGCCTGGCAGT - - - GTCAGAAGTC      | Human          |
|      | AACAACCA - - - - CAGAACC - - - - - ACAAGTTGGGTAGCCTGGCAGT - - - GTCAGAAGTG      | Mouse          |
|      | AACAACCA - - - - CAGAACC - - - - - ACAAGTTGGGTAGGC TGGCAGT - - - GTCAGAAGTC     | Dog            |
|      | AACAACCA - - - - CAGAACC - - - - - ACAAGTTGGGTAGCCTGGCAGT - - - CACACAAGAC      | Opossum        |
|      | AACAACCA - - - - CAGAACC - - - - - ACAAGTTGGGTAGCCTGGCAGT - - - CACAGAAGAG      | Platypus       |
|      | AACAACCA - - - - CAGAACC - - - - - ACAAGTTGGGTACAGAGGCAGT - - - CACACAAGAG      | Chicken        |
|      | AGCAACCA - - - - CAGAACC - - - - - ACAAGCTGCGC - - - - - GCAGA - - - CACTCGAGAG | Frog           |
| +97  | AACAACCA - - - - CAGAACC - - - - - ACAAGTTGGGTGCG - AACAGT - - - CACACAACAG     | <i>C.milli</i> |
|      | GACAACAAGTGGCAACAGGGATTAGCGAACCACAGACAAAAACAAGACCTAAAAAGCA                      | Fugu           |
|      |                                                                                 |                |
|      | TGAACCCAGCATAGTGGTCAGCAGGCAGGA - CGAATCAC - - - - - ACTGAATGCAAA -              | Human          |
|      | TAAAGCCAGCACAGTGGTCAGCAGGCAGGA - CGAATCAC - - - - - ACTGAATGCAAA -              | Mouse          |
|      | TGC GCCCGCATAGTGGTCAGCAAGCAGGA - CGAACCAC - - - - - ACTGACTGCAAA -              | Dog            |
|      | TGGGTCCGGGATATTGGTCAGCAGGCAGGG - CAAATCAC - - - - - ACTGTCTGCAAA -              | Opossum        |
|      | TGGGTCAAGGATA TCGGTACAGCGGCAGGG - CAAATCAT - - - - - ACTGAGTAGAAA -             | Platypus       |
|      | CGGGTCCGGGATATTGGTCAGCAGGCAGGG - CAAATCGC - - - - - TTTGACTGCAAA -              | Chicken        |
|      | TGGATCCGGGATA TTTGGTCAGCAAAAGGGGCGAA TCA TTTTCGTTGACTGAAAAAAA                   | Frog           |
| +143 | TGGGTCCGGGATA TTTGGTCAGCAAA TAGCAACTCATTTCTGATTTTAAACCAAGAGTG - -               | <i>C.milli</i> |
|      | ATGAAGGAAGATA - TGGTGAAGGAGAGAAAAAGAGCGGA - - - - - ACCAGAAAAGAG -              | Fugu           |
|      |                                                                                 |                |
|      | CCACA - GGGTTTCGCAGCGTG                                                         | Human          |
|      | CCACA - GGCTTTTCGCAGAGCG                                                        | Mouse          |
|      | CCACA - GGGTTTCGCAGAGTG                                                         | Dog            |
|      | CCACA - GAGTTTCGTAGAGCG                                                         | Opossum        |
|      | CCACA - GAGTTTCGCAGAGCG                                                         | Platypus       |
|      | CCACA - GAGTTTCGTAGAGTG                                                         | Chicken        |
|      | CCACAAGACTTTTCAGACATTG                                                          | Frog           |
| +201 | CCAAG - CGGCTTCGTAGAGTG                                                         | <i>C.milli</i> |
|      | - CACTGAGCAACTGAAAAGTA                                                          | Fugu           |

**B**

|      |                                                                          |                                     |                |
|------|--------------------------------------------------------------------------|-------------------------------------|----------------|
|      |                                                                          | <u>          </u> <u>          </u> |                |
|      | TGCAATCCTGTGAGCTGAGGTTGGGT - TGACACTGGGAAGGCCTGGTCCCTC                   | AACCACAG                            | Human          |
|      | TTGCAATCCTGTGATGTGAGATTGGGT - TGACACTGGGAAGGCTGGTCCCTC                   | AACCACAG                            | Mouse          |
|      | TTGCAATCCTGTGAGCTGAGGTTGGGT - TGACACTGTGAAGGCCTGGTCCCTC                  | AACCACAG                            | Dog            |
| +1   | CTTCGGGCTCAGAACACTGGTTGAGC - TGACACTGTGCGGGCC TCACTTTG                   | AACCACAG                            | <i>C.milli</i> |
|      | TTCAAAGCTCCCTGCAAACCTCAGCCACAACAATTTAATGGGCTTCTGCACG                     | GGTTTTAC                            | Fugu           |
|      |                                                                          |                                     |                |
|      | <u>          </u>                                                        |                                     |                |
|      | AACCACAAGGCCAG - - - GCCCTT - GCCGCCCTCCAGGGCCCTGCGCGGGAGCT - - GGTTGG   |                                     | Human          |
|      | AACCACAAGGCCAG - - - GCCCTC - GCCGCCCTCCAGGGCCCTGCG - AGGAGCT - - GGTTGG |                                     | Mouse          |
|      | AACCACAAGGCCAG - - - GCCCTCAGCCGCTTCAGGGCCCTGCGCGGGAGCT - - GGTTGG       |                                     | Dog            |
| +60  | AACCACAAGTGTGGTGTGGTGCAGCCTACTTCTCAGGACTTGCACTGAGTCTCAGTGGG              |                                     | <i>C.milli</i> |
|      | C - CCAAGAGGAAGACGGAA TGCTTCCAAAAGTTGTGG - - - - - GCAACAAAAGTAAAAATTGA  |                                     | Fugu           |
|      |                                                                          |                                     |                |
|      | CTCCTGGTGTCTCCCCACCCCT - GGCCGCCCTCGTACCCACCAGGCCTGGGCTCTGTCAA           |                                     | Human          |
|      | TTCCCTGGTG - TCCCCACCCCTGGCCACCCCTGGCCCTGCCACAGCCTGGGCTCCGTGGA           |                                     | Mouse          |
|      | CTCTTGGTCTCTCCCCACCCCTGGCCGCTCGCACCCACTGGAGCCCGGGCTCTGTTGG               |                                     | Dog            |
| +120 | TTGCTAGATA TTTTTTTTTAAAAA AAGGCT - - - ACCCACCACCAACTGGACCTCGGCAC        |                                     | <i>C.milli</i> |
|      | GAGCGAAGATGGAAGGTCAGGAGGAGATTTCAGAGAAACAACGATCAAGTAAAGAGAA G             |                                     | Fugu           |
|      |                                                                          |                                     |                |
|      | GGGTAA                                                                   |                                     | Human          |
|      | GGGTGA                                                                   |                                     | Mouse          |
|      | GGGTGA                                                                   |                                     | Dog            |
| +177 | GCAAG                                                                    |                                     | <i>C.milli</i> |
|      | GCAAA G                                                                  |                                     | Fugu           |
