# Supplementary material for: Runx Family Genes in a Cartilaginous Fish, the Elephant Shark (Callorhinchus milii)
Source: PubMed Central journal article supplement (PMC3974841; doi:10.1371/journal.pone.0093816), 2014-04-03
Supplement: pone.0093816.s002.pdf [file pone.0093816.s002.pdf]

**Table S1. Primers used for qRT-PCR.**

| Gene                    | Primer Name     | Primer Sequence (5'→ 3')  |
|-------------------------|-----------------|---------------------------|
| <i>CmRunx1</i>          | CmRUNX1 FW      | CAACAAAACCCTCCCCATCGCCTA  |
|                         | CmRUNX1 RV      | CTGTGATTTTGATGGCTCTGTGG   |
| <i>CmRunx2</i>          | CmRUNX2 FW      | AGCTATAAAGGTTACAGTGGATGGA |
|                         | CmRUNX2 RV      | CTGGCCTTGAGAACTGAAAGGAA   |
| <i>CmRunx3</i>          | CmRUNX3 FW      | TGCTGAGTAGTTTTTCATCGTTTCC |
|                         | CmRUNX3 RV      | AGATGAGCGAGCCGGTGTC       |
| <i>CmRunxb Type 1/2</i> | CmRUNXB T1/2 FW | CACCAACCCGAGAGTATGTGGAC   |
|                         | CmRUNXB T1/2 RV | TCCTCATATGCCTGCTGAGCTAAG  |
| <i>CmRunxb Type 3</i>   | CmRUNXB T3 FW   | ATCGAGATGACATGGAGGCACGCA  |
|                         | CmRUNXB T3 RV   | CTAGCGTAGTTTGAGTTCATCTCC  |
| <i>CmActin</i>          | CmActin FW      | GGTATTGTCACCAACTGGGA      |
|                         | CmActin RV      | AGATGGGCACAGTGTGGGTG      |
