# Supplementary material for: Runx Family Genes in a Cartilaginous Fish, the Elephant Shark (Callorhinchus milii)
Source: PubMed Central journal article supplement (PMC3974841; doi:10.1371/journal.pone.0093816), 2014-04-03
Supplement: pone.0093816.s003.pdf [file pone.0093816.s003.pdf]

**Table S2. CNEs in the *Runx* loci of human and elephant shark.**

| <b>CNE ID</b> | <b>Human <i>Runx</i> CNE coordinates (hg19)</b> | <b>Length (bp)</b> | <b>% identity</b> | <b>Location</b>                |
|---------------|-------------------------------------------------|--------------------|-------------------|--------------------------------|
| Runx1_CNE1    | Chr21:37204095-37204220                         | 126                | 73                | <i>Setd4-Runx1</i> intergenic  |
| Runx1_CNE2    | Chr21:37143334-37143451                         | 118                | 76                | <i>Setd4-Runx1</i> intergenic  |
| Runx1_CNE3    | Chr21:37031066-37031297                         | 232                | 76                | <i>Setd4-Runx1</i> intergenic  |
| Runx1_CNE4    | Chr21:36341746-36341933                         | 188                | 72                | <i>Runx1</i> intron            |
| Runx1_CNE5    | Chr21:36190839-36190995                         | 157                | 76                | <i>Runx1</i> intron            |
|               |                                                 |                    |                   |                                |
| Runx2_CNE1    | Chr6:44526642-44526813                          | 172                | 74                | <i>Cdc5l-Supt3h</i> intergenic |
| Runx2_CNE2    | Chr6:44886521-44886644                          | 124                | 71                | <i>Supt3h</i> intron           |
| Runx2_CNE3    | Chr6:44900237-44900389                          | 153                | 77                | <i>Supt3h</i> intron           |
| Runx2_CNE4    | Chr6:44988709-44988911                          | 203                | 71                | <i>Supt3h</i> intron           |
| Runx2_CNE5    | Chr6:45164020-45164128                          | 109                | 82                | <i>Supt3h</i> intron           |
| Runx2_CNE6    | Chr6:45305281-45305382                          | 102                | 78                | <i>Runx2</i> intron            |
| Runx2_CNE7    | Chr6:45401543-45401611                          | 69                 | 90                | <i>Runx2</i> intron            |
| Runx2_CNE8    | Chr6:45506422-45506519                          | 98                 | 74                | <i>Runx2</i> intron            |
|               |                                                 |                    |                   |                                |
| Runx3_CNE1    | Chr1:25501275-25501393                          | 119                | 73                | <i>Syf2-Runx3</i> intergenic   |
| Runx3_CNE2    | Chr1:25394035-25394210                          | 176                | 70                | <i>Syf2-Runx3</i> intergenic   |
